# Supplementary material for: Sequence shortening in the rodent ancestor
Source: HighWire-hosted journal article supplement (doi:10.1101/gr.121897.111), 2011-11-29
Supplement: Laurie_etal_supOctFinal.pdf [file Laurie_etal_supOctFinal.pdf]

**Supplementary file**  
**Laurie et al. 2011**

**Table 1**

| <b>Algorithm</b> | <b><i>orphan exons</i><sup>1</sup></b> | <b><i>over-aligned exons</i><sup>2</sup></b> |
|------------------|----------------------------------------|----------------------------------------------|
| <b>Prank+F</b>   | 2,315                                  | 3,024                                        |
| <b>MAFFT</b>     | 886                                    | 5,318                                        |
| <b>ClustalW</b>  | 705                                    | 13,789                                       |

**Table 1. Number of orphan and over-aligned exons identified in alignments by different multiple-alignment algorithms.** Alignments corresponded to orthologous coding sequences from five mammalian species (see main manuscript file). <sup>1</sup>Orphan exons are those for which there is no ortholog in the other species; identification by the alignment program means the exon is completely separated out (aligned with gaps). <sup>2</sup>Over-aligned exons are those for which the percentage identity was less than 0.5 across the corresponding part of the alignment, and there were no gaps.

**Table 2**

|                       | human       | macaque     | primate<br>ancestral | mouse       | rat         | rodent<br>ancestral |
|-----------------------|-------------|-------------|----------------------|-------------|-------------|---------------------|
| <b>Prank+F</b>        |             |             |                      |             |             |                     |
| Del (deletions)       | 2494        | 3884        | 7883                 | 9847        | 12381       | 47784               |
| Ins (insertions)      | 2285        | 2973        | 9582                 | 9911        | 9236        | 19971               |
| <b>Del/ Ins ratio</b> | <b>1.09</b> | <b>1.31</b> | <b>0.82</b>          | <b>0.99</b> | <b>1.34</b> | <b>2.39</b>         |
| <b>MAFFT</b>          |             |             |                      |             |             |                     |
| Del (deletions)       | 2563        | 3885        | 7574                 | 8672        | 10975       | 29509               |
| Ins (insertions)      | 673         | 1046        | 3217                 | 3477        | 3560        | 9046                |
| <b>Del/ Ins ratio</b> | <b>3.81</b> | <b>3.71</b> | <b>2.35</b>          | <b>2.49</b> | <b>3.08</b> | <b>3.26</b>         |
| <b>ClustalW</b>       |             |             |                      |             |             |                     |
| Del (deletions)       | 2906        | 3789        | 8476                 | 10435       | 12852       | 36601               |
| Ins (insertions)      | 515         | 727         | 3614                 | 2248        | 2228        | 7774                |
| <b>Del/ Ins ratio</b> | <b>5.64</b> | <b>5.21</b> | <b>2.35</b>          | <b>4.64</b> | <b>5.77</b> | <b>4.71</b>         |

**Table 2. Estimation of insertions and deletions in ancestral repeats using different multiple alignment programs.** The sequences correspond to syntenic ancestral repeats from five mammalian species (see main manuscript file). MAFFT and ClustalW estimate a much lower number of insertions than Prank+F.

**Table 3**

|                       | human       | macaque     | primate<br>ancestral | mouse       | rat         | rodent<br>ancestral |
|-----------------------|-------------|-------------|----------------------|-------------|-------------|---------------------|
| <b>Prank+F</b>        |             |             |                      |             |             |                     |
| Del (deletions)       | 91          | 129         | 434                  | 307         | 365         | 1597                |
| Ins (insertions)      | 86          | 105         | 273                  | 295         | 248         | 622                 |
| <b>Del/ Ins ratio</b> | <b>1.06</b> | <b>1.23</b> | <b>1.59</b>          | <b>1.04</b> | <b>1.47</b> | <b>2.57</b>         |
| <b>MAFFT</b>          |             |             |                      |             |             |                     |
| Del (deletions)       | 91          | 128         | 444                  | 316         | 351         | 1546                |
| Ins (insertions)      | 51          | 73          | 217                  | 236         | 185         | 537                 |
| <b>Del/ Ins ratio</b> | <b>1.78</b> | <b>1.75</b> | <b>2.05</b>          | <b>1.34</b> | <b>1.90</b> | <b>2.88</b>         |
| <b>ClustalW</b>       |             |             |                      |             |             |                     |
| Del (deletions)       | 99          | 121         | 394                  | 294         | 320         | 1366                |
| Ins (insertions)      | 35          | 61          | 223                  | 193         | 162         | 442                 |
| <b>Del/ Ins ratio</b> | <b>2.83</b> | <b>1.98</b> | <b>1.77</b>          | <b>1.52</b> | <b>1.98</b> | <b>3.09</b>         |

**Table 3. Estimation of insertions and deletions in coding sequences using different multiple alignment programs.** The sequences correspond to 3,126 orthologous coding sequences from five mammalian species (dataset for dN and dS calculation, see main manuscript file). MAFFT and ClustalW estimate a much lower number of insertions than Prank+F.

**Table 4**

|                                                    |                   | human | macaque | primate<br>ancestral | mouse | rat    | rodent<br>ancestral |
|----------------------------------------------------|-------------------|-------|---------|----------------------|-------|--------|---------------------|
| <b>Ancestral<br/>repeats<br/>(ARs)<sup>1</sup></b> | <b>Deletions</b>  |       |         |                      |       |        |                     |
|                                                    | N                 | 2,494 | 3,882   | 7,876                | 9,839 | 12,364 | 47,577              |
|                                                    | Length (bp)       |       |         |                      |       |        |                     |
|                                                    | Mean              | 2.2   | 2.5     | 2.5                  | 3.1   | 3.1    | 3.9                 |
|                                                    | Median            | 1     | 1       | 1                    | 2     | 2      | 2                   |
|                                                    | SD                | 2.1   | 2.8     | 3.1                  | 3.6   | 3.9    | 5.0                 |
|                                                    | <b>Insertions</b> |       |         |                      |       |        |                     |
|                                                    | N                 | 2,279 | 2,938   | 9,548                | 9,610 | 8,912  | 19,854              |
|                                                    | Length (bp)       |       |         |                      |       |        |                     |
|                                                    | Mean              | 2.7   | 3.4     | 3.3                  | 4.0   | 3.6    | 3.2                 |
|                                                    | Median            | 1     | 2       | 2                    | 2     | 2      | 2                   |
|                                                    | SD                | 3.9   | 6.8     | 4.3                  | 11.3  | 12.6   | 4.9                 |
| <b>coding<br/>Sequences<br/>(CDs)<sup>2</sup></b>  | <b>Deletions</b>  |       |         |                      |       |        |                     |
|                                                    | N                 | 214   | 296     | 933                  | 686   | 832    | 3487                |
|                                                    | Length (AAs)      |       |         |                      |       |        |                     |
|                                                    | Mean              | 1.6   | 1.6     | 1.8                  | 1.9   | 1.9    | 1.9                 |
|                                                    | Median            | 1     | 1       | 1                    | 1     | 1      | 1                   |
|                                                    | SD                | 1.2   | 1.6     | 1.5                  | 1.5   | 1.6    | 1.7                 |
|                                                    | <b>Insertions</b> |       |         |                      |       |        |                     |
|                                                    | N                 | 166   | 216     | 631                  | 620   | 558    | 1297                |
|                                                    | Length (AAs)      |       |         |                      |       |        |                     |
|                                                    | Mean              | 1.9   | 2.0     | 2.0                  | 1.7   | 1.8    | 1.9                 |
|                                                    | Median            | 1     | 1       | 1                    | 1     | 1      | 1                   |
|                                                    | SD                | 1.7   | 1.9     | 1.6                  | 1.6   | 1.5    | 1.7                 |

**Table 4. Descriptive statistics of deletion and insertion sizes in ancestral repeats and coding sequences.** <sup>1</sup>Number of ARs: 19,631; total length of aligned AR sequence: 4,746,950nt; events size 1-30 bp. <sup>2</sup>Number of CDs: 5,991; total length of aligned CDs : 11,705,952nt; events size 1-10 amino acids. N: number of events; bp: base pairs; AAs: amino acids; SD: standard deviation.

**Table 5**

|                         | human       | macaque     | primate<br>ancestral | mouse       | rat         | rodent<br>ancestral |
|-------------------------|-------------|-------------|----------------------|-------------|-------------|---------------------|
| <b>Tree 1 (n=5,991)</b> |             |             |                      |             |             |                     |
| Del (deletions)         | 214         | 296         | 933                  | 686         | 832         | 3,487               |
| Ins (insertions)        | 166         | 216         | 631                  | 620         | 558         | 1,297               |
| <b>Del/ Ins ratio</b>   | <b>1.29</b> | <b>1.37</b> | <b>1.48</b>          | <b>1.11</b> | <b>1.49</b> | <b>2.69</b>         |
| <b>Tree 2 (n=5,991)</b> |             |             |                      |             |             |                     |
| Del (deletions)         | 232         | 300         | 918                  | 704         | 882         | 3,425               |
| Ins (insertions)        | 166         | 225         | 597                  | 603         | 549         | 1,232               |
| <b>Del/ Ins ratio</b>   | <b>1.40</b> | <b>1.33</b> | <b>1.54</b>          | <b>1.17</b> | <b>1.61</b> | <b>2.78</b>         |
| <b>Tree 3 (n=4,840)</b> |             |             |                      |             |             |                     |
| Del (deletions)         | 117         | 168         | 489                  | 346         | 439         | 1,816               |
| Ins (insertions)        | 83          | 126         | 312                  | 335         | 322         | 699                 |
| <b>Del/ Ins ratio</b>   | <b>1.41</b> | <b>1.33</b> | <b>1.57</b>          | <b>1.03</b> | <b>1.36</b> | <b>2.60</b>         |

**Table 5. Estimation of insertions and deletions using different phylogenetic trees as input to Prank+F.** Tree 1 corresponds to that given in the text, calculated from a concatenate of a random subset of 150 ortholog sets. Tree 2 corresponds to the distances given by Miller *et al*, 2007 (Genome Res. 17: 1797-1808). Tree 3 corresponds to a six species tree, as for original dataset, but including *Monodelphis domestica* as a further outgroup. Due to some missing orthologs in *Monodelphis*, the data presented is for 4,840 ortholog sets.

**Table 6**

|                                                                 |                        |                           | human       | macaque      | primate<br>ancestral | mouse       | rat            | rodent<br>ancestral |
|-----------------------------------------------------------------|------------------------|---------------------------|-------------|--------------|----------------------|-------------|----------------|---------------------|
| Coding<br>sequence<br>dataset (5,991<br>ortholog sets)          | Number<br>of<br>events | Del<br>(deletions)        | 214         | 296          | 933                  | 686         | 832            | 3,487               |
|                                                                 |                        | Ins<br>(insertions)       | 166         | 216          | 631                  | 620         | 558            | 1,297               |
|                                                                 |                        | <b>Del/ Ins<br/>ratio</b> | <b>1.29</b> | <b>1.37*</b> | <b>1.48***</b>       | <b>1.11</b> | <b>1.49***</b> | <b>2.69***</b>      |
| CodeML<br>coding<br>sequence<br>subset (3,126<br>ortholog sets) | Number<br>of<br>events | Del<br>(deletions)        | 91          | 129          | 434                  | 307         | 365            | 1,597               |
|                                                                 |                        | Ins<br>(insertions)       | 86          | 105          | 273                  | 295         | 248            | 622                 |
|                                                                 |                        | <b>Del/Ins<br/>ratio</b>  | <b>1.06</b> | <b>1.23</b>  | <b>1.59***</b>       | <b>1.04</b> | <b>1.47*</b>   | <b>2.57***</b>      |

**Table 6. Estimated number of insertion and deletion events in orthologous sequences in different mammalian branches.** Events considered were of length 1-10 amino acids. Spearman correlation between Del/Ins ratio of the two datasets was  $\rho=0.94$ ,  $p<0.05$ . Asterisks indicate significant departures from the null hypothesis that insertions and deletions occur with equal frequency (Chi-squared test,  $*p<0.01$ ,  $***p<10^{-4}$ ). There is no significant difference in the relative frequency of indels in any species between the two datasets (Chi-squared,  $p>0.05$ ).

**Table 7**

|                                        |            | human | macaque | primate<br>ancestral | mouse | rat  | rodent<br>ancestral |
|----------------------------------------|------------|-------|---------|----------------------|-------|------|---------------------|
| <b>Deletions</b>                       | <b>Yes</b> |       |         |                      |       |      |                     |
|                                        | Mean       | 0.25  | 0.27    | 0.19                 | 0.21  | 0.19 | 0.14                |
|                                        | Median     | 0.19  | 0.22    | 0.15                 | 0.16  | 0.15 | 0.11                |
|                                        | SD         | 0.21  | 0.23    | 0.16                 | 0.21  | 0.14 | 0.10                |
|                                        | <b>NO</b>  |       |         |                      |       |      |                     |
|                                        | Mean       | 0.16  | 0.15    | 0.14                 | 0.13  | 0.12 | 0.09                |
|                                        | Median     | 0.10  | 0.09    | 0.09                 | 0.08  | 0.08 | 0.06                |
|                                        | SD         | 0.20  | 0.18    | 0.19                 | 0.16  | 0.15 | 0.08                |
| <b>Insertions</b>                      | <b>Yes</b> |       |         |                      |       |      |                     |
|                                        | Mean       | 0.22  | 0.22    | 0.17                 | 0.18  | 0.16 | 0.13                |
|                                        | Median     | 0.13  | 0.14    | 0.15                 | 0.13  | 0.13 | 0.11                |
|                                        | SD         | 0.27  | 0.24    | 0.15                 | 0.18  | 0.14 | 0.10                |
|                                        | <b>NO</b>  |       |         |                      |       |      |                     |
|                                        | Mean       | 0.16  | 0.15    | 0.14                 | 0.13  | 0.12 | 0.10                |
|                                        | Median     | 0.10  | 0.09    | 0.09                 | 0.08  | 0.08 | 0.07                |
|                                        | SD         | 0.20  | 0.18    | 0.19                 | 0.16  | 0.15 | 0.09                |
| <b>Deletions<br/>or<br/>Insertions</b> | <b>Yes</b> |       |         |                      |       |      |                     |
|                                        | Mean       | 0.24  | 0.24    | 0.18                 | 0.19  | 0.17 | 0.13                |
|                                        | Median     | 0.17  | 0.18    | 0.15                 | 0.14  | 0.13 | 0.11                |
|                                        | SD         | 0.24  | 0.24    | 0.16                 | 0.20  | 0.14 | 0.10                |
|                                        | <b>NO</b>  |       |         |                      |       |      |                     |
|                                        | Mean       | 0.16  | 0.15    | 0.14                 | 0.12  | 0.12 | 0.08                |
|                                        | Median     | 0.10  | 0.09    | 0.09                 | 0.08  | 0.08 | 0.06                |
|                                        | SD         | 0.19  | 0.18    | 0.19                 | 0.16  | 0.15 | 0.08                |

**Table 7. Non-synonymous to synonymous (dN/dS) ratio for mammalian proteins that have at least one indel event as indicated.** Differences for each category are highly significant ( $p < 0.01$ ) with the exception of the values for insertions in macaque (significant at  $p < 0.01$ ), and insertions in Human (not significant,  $p = 0.18$ ), Kolmogorov-Smirnov test.

**Table 8**

|                                             |                  |                      | human        | macaque       | primate<br>ancestral | mouse       | rat           | rodent<br>ancestral |
|---------------------------------------------|------------------|----------------------|--------------|---------------|----------------------|-------------|---------------|---------------------|
| Ancestral repeat dataset (19,631 sequences) | Number of events | Deletions            | 2,494        | 3,882         | 7,876                | 9,839       | 12,364        | 47,577              |
|                                             |                  | Insertions           | 2,279        | 2,938         | 9,548                | 9,610       | 8,912         | 19,854              |
|                                             |                  | <b>Del/Ins ratio</b> | <b>1.09*</b> | <b>1.32**</b> | <b>0.82**</b>        | <b>1.02</b> | <b>1.39**</b> | <b>2.40**</b>       |
| 3'UTRs dataset (746 sequences)              | Number of events | Deletions            | 290          | 327           | 1003                 | 972         | 1228          | 4440                |
|                                             |                  | Insertions           | 330          | 274           | 1296                 | 988         | 886           | 2044                |
|                                             |                  | <b>Del/Ins ratio</b> | <b>0.88</b>  | <b>1.19</b>   | <b>0.77**</b>        | <b>0.98</b> | <b>1.39**</b> | <b>2.17**</b>       |

**Table 8. Number of insertion and deletion events in orthologous non-coding sequences in different mammalian branches.** Events considered were of length 1-30 nucleotides. Spearman correlation between Del/Ins ratio of the two datasets was  $\rho = 0.94$ ,  $p < 0.05$ . \*Del/Ins different from 1 at  $p < 0.05$ , chi-squared test, 1df; \*\*Del/Ins different from 1 at  $p < 10^{-4}$ , chi-squared test, 1df.



**Table 9**

|                       | human       | macaque     | primate<br>ancestral | mouse       | rat         | rodent<br>ancestral |
|-----------------------|-------------|-------------|----------------------|-------------|-------------|---------------------|
| Del (deletions)       | 330         | 536         | 1,369                | 1,055       | 1,279       | 4,996               |
| Ins (insertions)      | 253         | 357         | 889                  | 859         | 801         | 1,827               |
| <b>Del/ Ins ratio</b> | <b>1.30</b> | <b>1.50</b> | <b>1.54</b>          | <b>1.23</b> | <b>1.60</b> | <b>2.73</b>         |

**Table 9. Number of insertions and deletions observed without pre-alignment filtering.** Data given are for 10,129 orthologous proteins obtained from Ensembl Version 55. Alignments were generated using Prank+F with branch lengths as described in Miller *et al*, 2007 (Genome Res. 17: 1797-1808). Following alignment, events observed adjacent to exon boundaries, and those occurring in regions with low sequence identity were excluded, as described in the text.

**Table 10**

| Specied     | Human         | Mouse         | Macaque       | Rat           | Cow           |
|-------------|---------------|---------------|---------------|---------------|---------------|
| Golden Path | 3,093,120,360 | 2,716,965,481 | 3,097,179,960 | 2,718,897,321 | 3,033,353,239 |

**Table 10. Golden path genome length for species used in this study.**

**Table 11**

|         | All Proteins |               | Proteins containing a low-complexity region |               | Proteins containing an AA tandem repeat $\geq 4$ |               |
|---------|--------------|---------------|---------------------------------------------|---------------|--------------------------------------------------|---------------|
|         | n            | Median (mean) | n                                           | Median (mean) | n                                                | Median (mean) |
| Human   | 5991         | 548 (679)     | 5157                                        | 589 (722)     | 2872                                             | 677 (824)     |
| Macaque | 5991         | 532 (658)     | 5078                                        | 577 (703)     | 2749                                             | 662 (806)     |
| Mouse   | 5991         | 544 (675)     | 5103                                        | 591 (720)     | 2479                                             | 678 (830)     |
| Rat     | 5991         | 538 (664)     | 5098                                        | 586 (709)     | 2707                                             | 673 (817)     |

**Table 11. Protein length in different datasets.** All proteins: all proteins in the 1:1 orthologous protein dataset; Proteins containing a low-complexity region: subset of proteins containing at least one low-complexity regions as identified by SEG with default parameters; Proteins containing an AA tandem repeat: subset of proteins containing at least one perfect amino acid tandem repeat of length 4 or longer.

Figure 1

```
ENSG00000168348|14|ENSP00000306523|566|MPRGFLVKRTRKRTGGLYRVRLAERVFFPL-LGPQGAPPFLEEAPSASLPGAERATPPPTREE
ENSMUG00000016483|7|ENSMUP00000021655|568|MPRGFLVKRTRKRTGCSYRVRLAEHVFFPL-LGPQGAPPFLEEAPRASLPGTERRAAPPTREE
ENSMUSG00000045440|12|ENSMUSP00000061046|493|MPRGFLVKRTRKRSYRARPVEPLFPP-PGPL-----AAQSSPEE
ENSRNOG00000007754|6|ENSRNOP00000010188|495|MPRGFLVKRTRKSGSFYRTRPAEPLFPP-PGPL-----AAPSPPEE
ENSBTAG00000027013|21|ENSBTAP00000038488|554|MPRGFLVKRTRKRTGGSYRVRLAERVFFPLFPRPPGTPPFPEEASSAPQPGVEREAHPTPEE
*****:* **.*.*:*** * :.:**

ENSG00000168348|14|ENSP00000306523|566|PGKGLTAEAAAREQSGSPCRAAGVSPGTGGREGAEWRAGREGPGP--SPSPSPSPAKPAG
ENSMUG00000016483|7|ENSMUP00000021655|568|PGKGLTEAAARELSGSPCRAAGVSPGAGGREGAEWRAGREGPGPSRSPGSPSPAKPAG
ENSMUSG00000045440|12|ENSMUSP00000061046|493|PGRGLL-----GSPCLAPP-----QDDAEWGAGGGDGP-----PSPARPAG
ENSRNOG00000007754|6|ENSRNOP00000010188|495|PDPGLL-----GSPCLAPP-----QDSTEWGAGGGDGP-----PSPARPAG
ENSBTAG00000027013|21|ENSBTAP00000038488|554|-----EEARELSGSSCPAARVSPAAGGREGAEWRADGREGPGP--SPSP--KPAG
*****:* **.*.*:*** * :.:**

ENSG00000168348|14|ENSP00000306523|566|AELRRAFLECLSSPVSASFPGGAAVAASFCSVAPAAAPTPEGEQFLPLRAPFPPEPAL
ENSMUG00000016483|7|ENSMUP00000021655|568|AELRRAFLECLSSPVSASFPGGAAVAASFCSVAPAAAPTSGEQFLPLRAPFPPEPAL
ENSMUSG00000045440|12|ENSMUSP00000061046|493|PELRRAFLECLRSFVSASFPSATA----FCSAAPAAV-TSGEE-LVPPQVVPVPI
ENSRNOG00000007754|6|ENSRNOP00000010188|495|PELRRAFLECLRSFVSASFPSATA----FCSAAPAAV-TSGEQ-LVPPQVVPVPI
ENSBTAG00000027013|21|ENSBTAP00000038488|554|VELRRAFLECLSSPVSASFPGGAAVAASFCSVAPAAAPTSGEQFLPLRAPFPPEPAL
*****:* **.*.*:*** * :.:**

ENSG00000168348|14|ENSP00000306523|566|QPD--PAPLSAALQSLKRAAGGERRGKAPTDCASGPAAGIKKPKAMRKLSPADEVTTSP
ENSMUG00000016483|7|ENSMUP00000021655|568|QPD--PVPLSTALQSLKRAAGGERRGKAPTGCASGPAAGIKKPKAMRKLSPADEVTTSP
ENSMUSG00000045440|12|ENSMUSP00000061046|493|VPG--PAPH-----GLQRRGKAPVCASAPAA--VRKPKAVRRLSPADEVTTSP
ENSRNOG00000007754|6|ENSRNOP00000010188|495|VPSVSPAPH-----GLQRRGKAPVCASAPAA--VRKPKAVRRLSPADEVTTSP
ENSBTAG00000027013|21|ENSBTAP00000038488|554|HPD--PAPLSATLHGLKRATGGERRAKAPSGCASGPAAGVKKPKAMRKLSPADEVTTSP
* *.* * :*:*. *.*.* :*:*:*:*****

ENSG00000168348|14|ENSP00000306523|566|VLGLKIKEEPEGAPSRGLGGSRTPLGEFICQLCKEQYADPFALAQHRCRSRIRVVEYRCPE
ENSMUG00000016483|7|ENSMUP00000021655|568|VLGLKIKEEPEGAPSRGLGGSRTPLGEFICQLCKEQYADPFALAQHRCRSRIRVVEYRCPE
ENSMUSG00000045440|12|ENSMUSP00000061046|493|VLGLKIKEEPEGAPARALGGVRTPLGEFICQLCKHQYADPFALAQHRCRSRIRVVEYRCPE
ENSRNOG00000007754|6|ENSRNOP00000010188|495|VLGLKIKEEPEGAPARALGGVRTPLGEFICQLCKQYADPFALAQHRCRSRIRVVEYRCPE
ENSBTAG00000027013|21|ENSBTAP00000038488|554|VLGLKIKEEPEGAPSRGPGGSRTPLGEFICQLCKEQYADPFALAQHRCRSRIRVVEYRCPE
*****:* * *****.*****

ENSG00000168348|14|ENSP00000306523|566|CDKVFSCPANLASHRRWHKPRPAAANAATVSSADGKPPSSSSSSSRDGAIASFLAEGKE
ENSMUG00000016483|7|ENSMUP00000021655|568|CDKVFSCPANLASHRRWHKPRPAAANAATVSSADGKPPSSSSSSSRDGAIASFLAEGKE
ENSMUSG00000045440|12|ENSMUSP00000061046|493|CDKVFSCPANLASHRRWHKPRPTPACAA-----KPPHAPLTPPDPS-----LATGKE
ENSRNOG00000007754|6|ENSRNOP00000010188|495|CDKVFSCPANLASHRRWHKPRPTPACTAS-----KPPHAPLTPPDPS-----LAAGKE
ENSBTAG00000027013|21|ENSBTAP00000038488|554|CDKVFSCPANLASHRRWHKPRPAAANAATISSADGKLP--PSSSSSDSGTVASFLAEGKE
*****:* :*: * * . :. * * **

ENSG00000168348|14|ENSP00000306523|566|NSRIERTADQHPQARDSSGADQHPDSAPRQGLQVLTHPEPPLPGQPYTEGVLRGRVVPVG
ENSMUG00000016483|7|ENSMUP00000021655|568|NSRIERTADQHPQARDSSGTDQHPDSAPRQGLQVLTHPEPPLPGQPYTEGVLRGRVVPVG
ENSMUSG00000045440|12|ENSMUSP00000061046|493|NGRVPRTDQHPQAPDSSGDGQHRDASARPGQLQVLYPEAARPAQPYVEVILGRHGPSS
ENSRNOG00000007754|6|ENSRNOP00000010188|495|NGCLPRTDQHPQARDSSGDGQHRDASALPGQLQVLYPEAARPAQPYSEVILGRHGPSS
ENSBTAG00000027013|21|ENSBTAP00000038488|554|NSRAERTEQHPQARDSSGTEQHQDSAPQPGQLQVLSHPPEPLPQLPYTAGVLRGRVPEPG
* . ** **: * ** * ** * * :*: * ** . :*: * ..

ENSG00000168348|14|ENSP00000306523|566|STSGGRGSEIFVCPYCHKKFRQAYLRKHLSTHEAGSARALAPGFGSERGAPLAFACPLC
ENSMUG00000016483|7|ENSMUP00000021655|568|STSGGGGSEIFVCPYCHKKFRQAYLRKHLSTHEAGSVRALAPGFGSERGAPLAFACPLC
ENSMUSG00000045440|12|ENSMUSP00000061046|493|GASAGATSEVFCVCPYCHKKFRQAYLRKHLGTHETGSARATTPGFGSERTAPLTFACPLC
ENSRNOG00000007754|6|ENSRNOP00000010188|495|GASTGATSEVFCVCPYCHKKFRQAYLRKHLGTHETGSARATTPGFGSERTAPLTFACPLC
ENSBTAG00000027013|21|ENSBTAP00000038488|554|SASGVGGEIFVCPYCHKKFRQAYLRKHLGTHETGSARALGFCFGSERGAPLAFACPLC
.:* .*:*****.*****.*****.*****

ENSG00000168348|14|ENSP00000306523|566|GAHFPTADIREKHLRHWAVREELLPLALAGAPPETSGPGSPDGSAAQIFSKCKHPSTFF
ENSMUG00000016483|7|ENSMUP00000021655|568|GAHFPTADIREKHLRHWAVREELLPLALAGAPSETPGPGSPDGSAAQIFSKCKHPSTFF
ENSMUSG00000045440|12|ENSMUSP00000061046|493|GAHFPSADIREKHLRHWAVREELLPLALVGAPSE-AGPGGASDGSAAQIFSKCKYCPSTFF
ENSRNOG00000007754|6|ENSRNOP00000010188|495|GAHFPSADIREKHLRHWAVREELLPLALVGAPTE-AGPGGASEGSAQIFSKCKYCPSTFF
ENSBTAG00000027013|21|ENSBTAP00000038488|554|GAHFPSADIRDKHLRHWAVREELLPLALAGAPPDAPNPGRAPDGAQIFSKCKHPSTFF
*****:*****:*****:*****.*****.: ..* .*:*****:*****

ENSG00000168348|14|ENSP00000306523|566|SSPGLTRHINKCHPSESQVLLQMPLRPGC
ENSMUG00000016483|7|ENSMUP00000021655|568|SSPGLTRHINKCHPSESQVLLQMPLRPGC
ENSMUSG00000045440|12|ENSMUSP00000061046|493|SSPGLTRHINKCHPSESQVLLQMPLRPGC
ENSRNOG00000007754|6|ENSRNOP00000010188|495|SSPGLTRHINKCHPSESQVLLQMPLRPGC
ENSBTAG00000027013|21|ENSBTAP00000038488|554|SSPGLTRHINKCHPSESQVLLQMPLRPGC
*****:*****:*****:*****:*****
```

Figure 1. Multiple sequence alignment of insulinoma-associated 2 protein. Sequences are from human (ENSP00000306523), macaque (ENSMUP00000021655), mouse (ENSMUSP00000061046), rat (ENSRNOP00000010188) and cow (ENSBTAP00000038488). The protein is encoded by a single exon. It is approximately 10% shorter in the rodents than in the other species (494 versus 554 in cow and 567 in primates) due to 8 short deletions (totalling 29 amino acids) and two larger deletions of 11 and 19 amino acids, respectively.

**Figure 2**

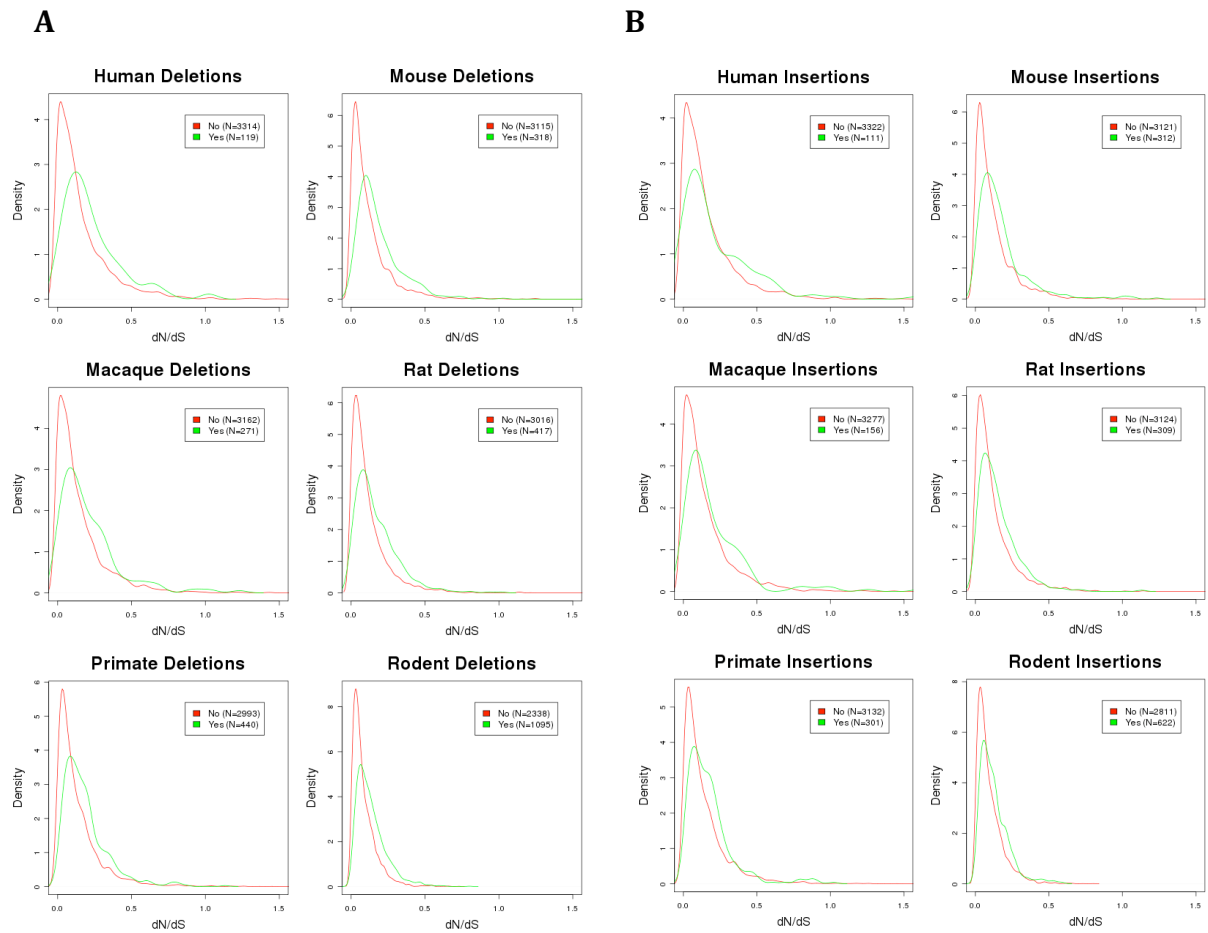

**Figure 2. dN/dS distribution for proteins which have (Yes), or do not have, (No) an indel event.** The distributions in each graph are all significantly different except that of human insertions (see Supplementary Table 5 for averages and p-values). Proteins that have at least one indel event have higher dN/dS than proteins with no indel events.

## Supplementary Methods

### Sequences

*Ancestral Repeats* The *extract pairwise MAF blocks* feature of Galaxy was used to extract regions syntenic to human ancestral repeats, where available, in the macaque, mouse, rat, and cow genomes, through the UCSC genome browser. An in-house Perl script was used to stitch the ends of contiguous regions of pairwise output, providing a final set of 19,631 orthologous ancestral repeat regions, which were then re-aligned with Prank<sub>+</sub><sub>F</sub>, using the same distance tree as for the coding sequences.

*Coding Sequences* Where more than one transcript per gene was available we used the longest transcript, as provided by default by Ensembl. Ortholog sets were removed in cases where any protein sequence contained an “X”, indicating that the residue had not been clearly defined, or where the length of the shortest protein sequence in the set was less than 50% of the length of the longest protein in the same set or where the protein length was less than 100 amino acids. Further sets were removed where calculated values of dS or dN were less than 0.01, or dN was greater than 2 for any branch. Keeping only those sets for which there was concordance in identification of 1 to 1 orthologs with Ensembl Version 55, resulted in a further reduction in sets.

### Post-alignment filters

Initial appraisal of alignments by eye indicated that there were a relatively large number of cases where parts of the alignment did not appear to represent truly orthologous sequences, in particular with respect to macaque sequences. Detailed examination of such dubious alignments by returning to Ensembl and investigating the exonic structure of the underlying protein sequences indicated that many individual macaque exons described in Ensembl are likely to have annotation errors. This was also observed, though to a lesser frequency, in some rat sequences. Alignment of incorrectly defined exons will result in gaps that will appear to be indel events. In order to limit the incorporation of such spurious indels in downstream analyses, the positions of all exons in all proteins were mapped onto the MSAs and any exons showing less than 50% similarity were excluded from further indel analysis. In addition, indels found immediately adjacent to exon boundaries were discounted, as they are more likely to represent annotation errors than *bona fide* indels.

### Analysis of sequence context of indels

Low complexity regions were identified using SEG with default parameters, while the parameters ‘4,0,0’ were used to identify pure amino-acid tracts of length four or more. For observed insertion events, the area that corresponded to the insertion had to be completely within a low-complexity region or amino acid tandem repeat in the same species. For deletions, the orthologous region in the protein of the sister species was used, since this is expected to provide the best approximation of the sequence background upon which the deletion occurred.

## **Comparison of insertions and deletions in ancestral repeats and coding sequences**

To assess the strength of purifying selection in eliminating amino acid insertions and deletions from coding sequences we identified all events of a size that is a multiple of 3nt in ancestral repeats and compared them to the same type of event in coding sequences. The observed proportion of deletion versus insertion events in ancestral repeats was used to estimate the expected number of deletions and insertions in coding sequences. For example in the rat branch deletions represented 54% of all events. Taking into account the total number of events in CDs (1,390) we would expect 746 deletions and 644 insertions. The observed numbers, 832 deletions and 558 insertions, are significantly different to those expected using a chi-square test with 1 d.f. ( $p < 10^{-3}$ ).

## **Estimation of nucleotide substitution rates**

Following completion of this step, further ortholog sets were removed if the number of complete columns in the alignment was less than 100, or if the value calculated for dS was less than 0.01, or if either dN or dS was greater than 2.0, as estimates of dN/dS have been shown to be unreliable in such cases (Toll-Riera et al. 2010).
